# Supplementary material
Source: Springer Nature journal article supplement (https://www.springermedizin.de/resource/supplementary/12985_2010_1066_MOESM4_ESM.pdf/9609074)

P = 0.007

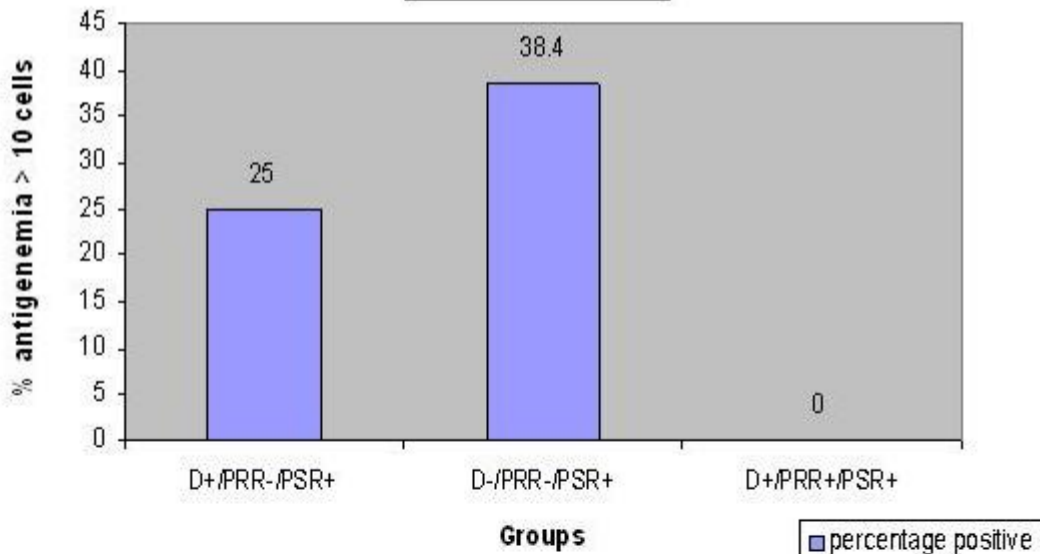

Supplement: MOESM4 [file 9609074]
